# Supplementary material for: Venetoclax plus hypomethylating agents in newly diagnosed acute myeloid leukemia patients with RUNX1::RUNX1T1: a retrospective propensity score matching study
Source: PubMed Central journal article supplement (PMC10682468; doi:10.1038/s41408-023-00948-x), 2023-11-27
Supplement: 41408_2023_948_MOESM1_ESM.pdf [file 41408_2023_948_MOESM1_ESM.pdf]

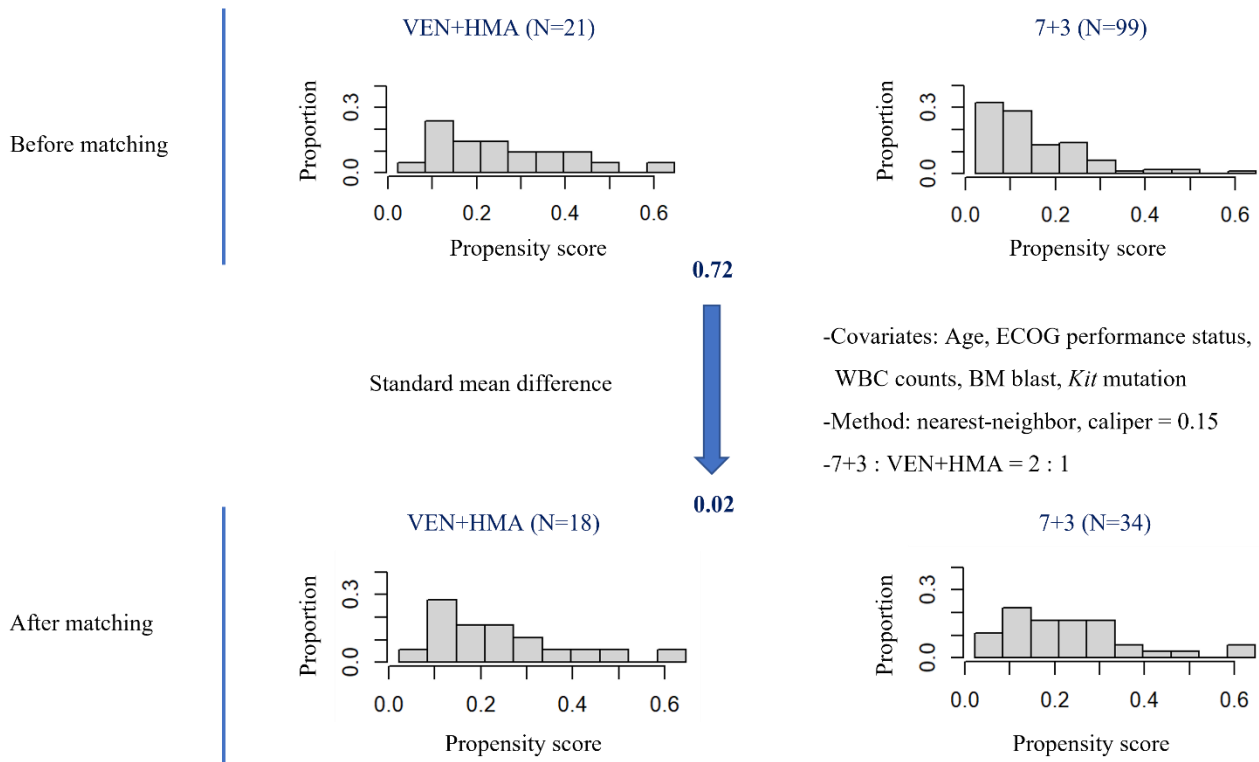

Figure S1. Propensity score matching process.

Abbreviations: BM, bone marrow; ECOG, Eastern Co-operative Oncology Group; HMA, hypomethylating agent; VEN, venetoclax, WBC, white blood cell.

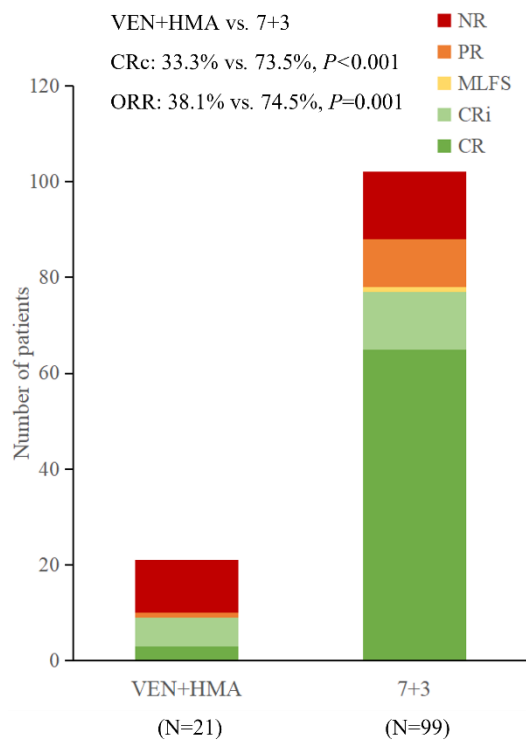

Figure S2. Response outcomes after cycle 1 in unmatched cohorts. Abbreviations: CR, complete remission, CRi, complete remission with incomplete hematologic recovery, HMA, hypomethylating agents, NR, no response, PR, partial remission, VEN, venetoclax.

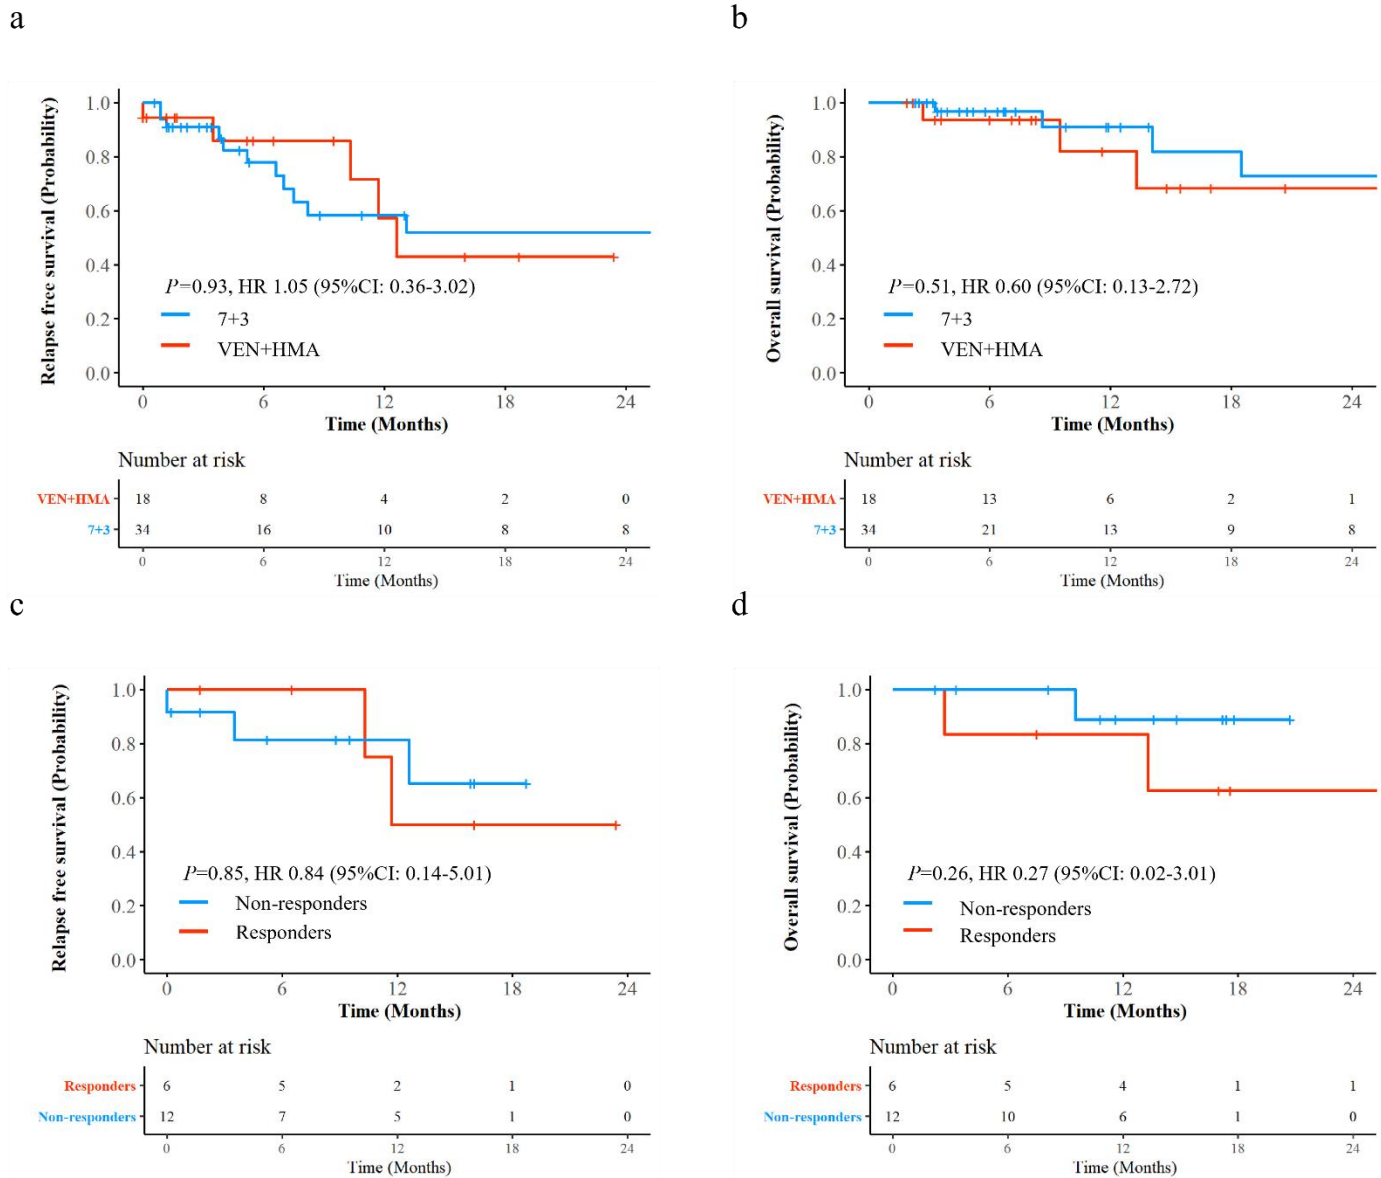

Figure S3. (a) Relapse-free survival and (b) overall survival when censored at allo-HSCT in the matched cohorts. Subgroup analysis of (c) Relapse-free survival and (d) overall survival between responders and non-responders in the matched VEN+HMA cohort.

Supplementary Table 1. Comparison of treatment responses in matched cohorts.

|                                                       | VEN+HMA<br>(N=18) | Standard 7+3<br>(N=34) | <i>P</i> value |
|-------------------------------------------------------|-------------------|------------------------|----------------|
| <b>Response outcome after 1 cycle of induction</b>    |                   |                        |                |
| <b>Overall response rate (ORR)</b>                    | 5 (27.8)          | 22 (64.7)              | 0.01           |
| CR                                                    | 2 (11.1)          | 18 (53.0)              |                |
| CRi                                                   | 3 (16.7)          | 3 (8.8)                |                |
| MLFS                                                  | 0                 | 1 (2.9)                |                |
| <b>PR</b>                                             | 1 (5.5)           | 4 (11.8)               |                |
| <b>NR</b>                                             | 12 (66.7)         | 8 (23.5)               |                |
| <b>Composite complete response rate (CRc)</b>         | 5 (27.8)          | 21 (61.8)              | 0.02           |
| MFC MRD available                                     | 5                 | 18                     |                |
| CR with MFC MRD negative                              | 3 (60.0)          | 12 (66.7)              | 1.00           |
| CR with MFC MRD positive                              | 2 (40.0)          | 6 (33.3)               |                |
| <b>Response outcome after 1~2 cycles of induction</b> |                   |                        |                |
| <b>Overall response rate (ORR)</b>                    | 6 (33.3)          | 23 (67.7)              |                |
| CR                                                    | 2 (11.1)          | 19 (76.9)              |                |
| CRi                                                   | 4 (22.2)          | 3 (7.7)                |                |
| MLFS                                                  | 0                 | 1 (2.9)                |                |
| <b>PR</b>                                             | 1 (5.5)           | 3 (8.8)                |                |
| <b>NR</b>                                             | 11 (61.1)         | 8 (23.5)               |                |
| <b>Composite complete response rate (CRc)</b>         | 6 (33.3)          | 22 (64.7)              |                |
| MRD available                                         | 6                 | 19                     |                |
| CR with MRD negative                                  | 4 (66.7)          | 13 (68.4)              | 1.00           |
| CR with MRD positive                                  | 2 (33.3)          | 6 (31.6)               |                |

Abbreviations: CR: complete remission; CRi: CR with incomplete hematologic recovery ; MLFS; morphologic leukemia-free state; MRD: measurable residual disease; NR: no response; PR: partial remission.

Supplementary Table 2. Molecular MRD assessment after the 2<sup>nd</sup> consolidation in matched cohorts.

|                                 | VEN+HMA<br>(n=5) § | Standard 7+3<br>(n=22) * | P value |
|---------------------------------|--------------------|--------------------------|---------|
| qPCR MRD available              | 5                  | 18                       |         |
| qPCR MRD negative               | 5 (100.0)          | 15 (83.3)                | 1.00    |
| qPCR MRD positive               | 0                  | 3 (16.7)                 |         |
| Relapse/Death from MRD negative | 2/5(40)            | 2/15(13.3)               | 0.25    |

\* 1 patient underwent allo-HSCT after standard 7+3 reinduction whose MRD (qPCR) was negative before HSCT, is included in this setting

§ 6 patients achieved CRc after 1~2 cycles of VEN+HMA as induction, 1 patient died from infection at first consolidation.

The ratio of *RUNX1/RUNX1T1* transcripts to ABL1  $\geq 2\%$  is considered as qPCR MRD positive.

Supplementary Table 3. Exploratory analysis of baseline characteristics of patients in the unmatched VEN+HMA cohort.

| Baseline characteristics                          | Responders<br>(n=9) | Non-responders<br>(n=12) | <i>P</i> value |
|---------------------------------------------------|---------------------|--------------------------|----------------|
| Age, years, median (range)                        | 48.0 (25-65)        | 37.5 (17-75)             | 0.40           |
| Male sex, n (%)                                   | 6 (66.7)            | 8 (66.7)                 | 1.00           |
| ECOG performance status, n (%)                    |                     |                          | 0.66           |
| 0~1                                               | 7 (77.8)            | 8 (66.7)                 |                |
| ≥ 2                                               | 2 (22.2)            | 4 (33.3)                 |                |
| WBC at diagnosis, ×10 <sup>9</sup> /L, n (%)      |                     |                          | 1.00           |
| > 10                                              | 6 (66.7)            | 7 (58.3)                 |                |
| ≤ 10                                              | 3 (33.3)            | 5 (41.7)                 |                |
| Platelet at diagnosis, ×10 <sup>9</sup> /L, n (%) |                     |                          | 1.00           |
| > 20                                              | 5 (55.6)            | 6 (50.0)                 |                |
| ≤ 20                                              | 4 (44.4)            | 6 (50.0)                 |                |
| Bone marrow blasts (%), median (range)            | 43.0 (35.8-59.8)    | 61.0 (37.6-78.3)         | 0.58           |
| Karyotype, n/N (%)                                |                     |                          | 0.60           |
| t (8;21) or t (8;21) with loss of X/Y             | 7/8(87.5)           | 8/12(66.7)               |                |
| other abnormalities                               | 1/8(12.5)           | 4/12(33.3)               |                |
| Co-mutation, n/N (%)                              |                     |                          |                |
| Active signals                                    |                     |                          |                |
| <i>CBL</i>                                        | 1/9 (11.1)          | 1/12 (8.3)               |                |
| <i>CCND2</i>                                      | 2/9 (22.2)          | 0                        |                |
| <i>FLT3-ITD</i>                                   | 1/9 (11.1)          | 2/12 (16.7)              |                |
| <i>FLT3-TKD</i>                                   | 1/9 (11.1)          | 2/12 (16.7)              |                |
| <i>JAK1/2/3</i>                                   | 1/9 (11.1)          | 2/12 (16.7)              |                |
| <i>KIT</i>                                        | 6/9 (66.7)          | 6/12 (50.0)              |                |
| <i>D816</i>                                       | 2/9 (22.2)          | 6/12 (50.0)              |                |
| Others                                            | 4/9 (44.4)          | 0                        |                |
| <i>NRS/KRAS</i>                                   | 1/9 (11.1)          | 2/12 (16.7)              |                |
| <i>PTPN11</i>                                     | 0                   | 1/12 (8.3)               |                |
| Chromatin-cohesin*                                | 6/9 (66.7)          | 2/12 (16.7)              | <b>0.03</b>    |
| DNA methylation                                   |                     |                          |                |
| <i>DNMT3A</i>                                     | 1/9 (11.1)          | 1/12 (8.3)               | 1.00           |
| <i>TET2</i>                                       | 1/9 (11.1)          | 3/12 (25.0)              | 0.60           |
| Others                                            |                     |                          |                |
| <i>DHX15</i>                                      | 0                   | 2/12 (16.7)              |                |
| <i>ZBTB7A</i>                                     | 1/9 (11.1)          | 0                        |                |
| Immunophenotype, n/N (%)                          |                     |                          |                |
| CD19 expression                                   | 8/9 (88.9)          | 8/12 (66.7)              | 0.34           |
| CD56 expression                                   | 6/9 (66.7)          | 8/12 (66.7)              | 1.00           |

Results reported as n (%), n/N (%), or median [range].

\* chromatin-cohesin genes: *ASXL1/2, BCOR, EZH2, KMT2A SETD2, CREBBP, RAD21, SMC1A, SMC3, STAG2*

Supplementary Table 4. Efficacy of venetoclax combined with azacytidine in *RUNX1::RUNX1T1*-positive AML patients from the literature.

| Reference                    | Total Number | Regimen | Cycles                   | newly diagnosed AML |    |    |         |          | relapsed or refractory AML |    |    |         |          |
|------------------------------|--------------|---------|--------------------------|---------------------|----|----|---------|----------|----------------------------|----|----|---------|----------|
|                              |              |         |                          | Response            |    |    | Numbers | CRc rate | Response                   |    |    | Numbers | CRc rate |
|                              |              |         |                          | CR/CRi              | PR | NR |         |          | CR/CRi                     | PR | NR |         |          |
| Yu, W.J. <i>et al.</i> [12]  | 7            | VEN+AZA | 1                        | 2                   | UK | UK | 4       | 50%      | 0                          | UK | UK | 3       | 0%       |
| Mi, R. H. <i>et al.</i> [10] | 6            | VEN+AZA | 1                        | 1                   | 0  | 4  | 5       | 25%      | 0                          | 0  | 1  | 1       | 0%       |
| Weng, G.Y, <i>et al.</i> [9] | 5            | VEN+AZA | Median of 2 (range, 1-4) |                     |    |    |         |          | 0                          | 1  | 4  | 5       | 0%       |
| Yu, G.P, <i>et al.</i> [11]  | 7            | VEN+AZA | UK                       |                     |    |    |         |          | 0                          | UK | UK | 7       | 0%       |

Abbreviations: AZA, azacytidine; ND, newly diagnosed; R/R, relapsed or refractory; UK, unknown; VEN, venetoclax.

Supplementary Table 5. Data of patients in matched VEN+HMA cohort who underwent allo-HSCT.

| Pt No. | Sex | Age | Donor type | Reasons for allo-HSCT                    | Copies of <i>RUNX1::RUNX1T1</i> by qPCR |                | Current status  |
|--------|-----|-----|------------|------------------------------------------|-----------------------------------------|----------------|-----------------|
|        |     |     |            |                                          | Before allo-HSCT                        | last follow-up |                 |
| 3      | F   | 17  | HID        | <i>KIT</i> D816 mut relapse              | 1323%                                   | 0              | MRD negative CR |
| 13     | F   | 44  | MSD        | <i>KIT</i> D816 mut Persistent MRD       | 0.47%                                   | 0.05%          | MRD negative CR |
| 14     | F   | 30  | MUD        | <i>KIT</i> D816 mut EMD                  | 0.1%                                    | 0              | MRD negative CR |
| 15     | M   | 37  | HID        | MRD elevation >1 log after consolidation | 69.89%                                  | 0              | Relapse         |
| 17     | M   | 41  | MSD        | <i>KIT</i> D816 mut relapse              | 147.24%                                 | 0.04%          | MRD negative CR |
| 21     | M   | 32  | MUD        | <i>KIT</i> D816 mut relapse              | 8.91%                                   | 67.53%         | relapse         |

Abbreviations: Allo-HSCT: allogeneic hematopoietic stem cell transplantation; CR: complete remission; EMD: extramedullary disease; F: female; HID: haplo-identical donor; M: male; MRD: measurable residual disease; MSD: matched sibling donor; MUD: matched unrelated donor; mut: mutation; Pt: patient.
